# Supplementary material for: Notfallkompetenzen für Medizinstudierende
Source: Springer Nature journal article supplement (doi:10.1007/s10049-024-01307-4), 2024-03-05
Supplement: MOESM1 [file 26822608]

## Auswertung der Fragebogen-Aussagen

Merkmalausprägungen als 5-Punkt Likert Skala:

trifft völlig zu (5), trifft teilweise zu (4), unentschieden (3), trifft wenig zu (2), trifft gar nicht zu (1)

| Nr                  | Aussage                                                                                                                                                                                              | n   | MW   | StabW |
|---------------------|------------------------------------------------------------------------------------------------------------------------------------------------------------------------------------------------------|-----|------|-------|
| <b>Simulation</b>   |                                                                                                                                                                                                      |     |      |       |
| 2                   | Ich konnte die Technik voll ausblenden und mich auf die Situation/Inhalt konzentrieren.                                                                                                              | 117 | 3,72 | 1,04  |
| 5                   | Ich habe mich für die Patientin in der virtuellen Realität verantwortlich gefühlt.                                                                                                                   | 118 | 4,37 | 0,86  |
| 6                   | Ich habe die Simulation als Spiel wahrgenommen.                                                                                                                                                      | 117 | 3,09 | 1,06  |
| 7                   | Die Interaktion mit der Patientin empfand ich als realistisch.                                                                                                                                       | 117 | 3,62 | 1,07  |
| 10                  | Im Rahmen der Simulation war ich fokussierter, als ich es bei der theoretischen Vermittlung von Inhalten bin.                                                                                        | 118 | 4,38 | 1,02  |
| 13                  | Das Szenario erschafft eine realistische Umgebung.                                                                                                                                                   | 118 | 4,39 | 0,74  |
| 17                  | Ich hatte das Gefühl mich in einer echten Notaufnahme zu befinden.                                                                                                                                   | 118 | 3,87 | 1,07  |
| 18                  | Ich habe den Verlust der Orientierung und des Zeitgefühls im echten Raum als sehr unangenehm empfunden.                                                                                              | 118 | 1,91 | 1,09  |
| 24                  | Eine tutorielle Begleitung sowie ein direktes Feedback halte ich für unabdingbar.                                                                                                                    | 118 | 4,86 | 0,54  |
| <b>Kompetenzen</b>  |                                                                                                                                                                                                      |     |      |       |
| 3                   | Durch meine eingeleiteten Maßnahmen konnte ich Therapieerfolge wahrnehmen.                                                                                                                           | 116 | 4,11 | 0,87  |
| 8                   | Durch die VR-Einheit kann ich meine praktischen Fähigkeiten verbessern.                                                                                                                              | 117 | 4,45 | 0,87  |
| 9                   | Die Simulation in der virtuellen Realität ist ein Lernprozess.                                                                                                                                       | 118 | 4,81 | 0,51  |
| 14                  | Die VR-Einheit verbessert meinen Umgang mit Notfallpatient:innen.                                                                                                                                    | 117 | 4,59 | 0,68  |
| 16                  | Durch die Durchführung der VR-Einheit habe ich Kompetenzen dazu gewonnen, zu denen die alleinige Bearbeitung des „Lernmoduls für die spezielle Vorbereitung auf die VR-Einheit“ nicht geführt hätte. | 118 | 4,61 | 0,73  |
| 20                  | Durch die VR-Einheit lerne ich Maßnahmen zu priorisieren.                                                                                                                                            | 118 | 4,40 | 0,74  |
| 22                  | Durch die Veranstaltung fühle ich mich besser auf reale Notfallsituationen vorbereitet.                                                                                                              | 115 | 4,33 | 0,86  |
| <b>Gefühle</b>      |                                                                                                                                                                                                      |     |      |       |
| 1                   | Mir ging es während der gesamten Simulation körperlich sowie psychisch gut.                                                                                                                          | 116 | 4,71 | 0,62  |
| 12                  | Ich habe das Gefühl, dass die VR-Einheit meine Lernmotivation steigern konnte.                                                                                                                       | 117 | 4,69 | 0,65  |
| 15                  | Ich habe mich in der Simulation überfordert gefühlt.                                                                                                                                                 | 117 | 3,21 | 1,22  |
| 21                  | Ich habe mich während der gesamten Simulation im echten Raum sicher und gut aufgehoben gefühlt.                                                                                                      | 118 | 4,60 | 0,67  |
| 23                  | Ich habe während oder nach der VR-Einheit Stress oder Angst empfunden.                                                                                                                               | 113 | 1,99 | 1,69  |
| <b>Vorbereitung</b> |                                                                                                                                                                                                      |     |      |       |
| 4                   | Durch das „Lernmodul zur speziellen Vorbereitung auf die VR-Einheit“ hatte ich ausreichend Wissen, um die simulierte Situation zu bewältigen.                                                        | 117 | 4,22 | 0,83  |
| 11                  | Der Zeitaufwand für die Vorbereitung, ist dem Lernerfolg angemessen.                                                                                                                                 | 118 | 4,52 | 0,79  |
| 19                  | Die Vorbereitungsmodule halfen mir, mich in dem Szenario zurecht zu finden.                                                                                                                          | 116 | 4,24 | 0,86  |

Nr. = Position im Fragebogen, MW = Mittelwert, SD = Standardabweichung,

n = Anzahl der ausgefüllten Fragebögen zu diesem Item
